# Supplementary material for: Metabolism-Related Gene Expression in Circulating Tumor Cells from Patients with Early Stage Non-Small Cell Lung Cancer
Source: MDPI journal article supplement (doi:10.3390/cancers14133237), 2022-06-30
Supplement: s1 [file s1]

Table S1. PCR primers and probes sequences.

|              |              |                                     |      |
|--------------|--------------|-------------------------------------|------|
| <i>HK2</i>   | Forward      | 5'-CCCTCTACAAGCTACATCCTCACTT-3'     | 60.6 |
|              | Reverse      | 5'-CACGGATGCGGCAGGC-3'              | 61.8 |
| <i>PHGDH</i> | Forward      | 5'-GGGAGCGGAAGAAGTTCA-3'            | 55.4 |
|              | Reverse      | 5'-CTATAGTCTTCATCCCAAAGGAC-3'       | 54.8 |
| <i>MCT1</i>  | Forward      | 5'-CATGATTGTTGGTGGCTGC-3'           | 54.9 |
|              | Reverse      | 5'-GAAGGCAAGCCCAAGACC-3'            | 56.5 |
|              | TaqMan Probe | 5'-FAM-TCAGGCTGTGGCTTGATTGCA-BHQ-3' | 59.8 |

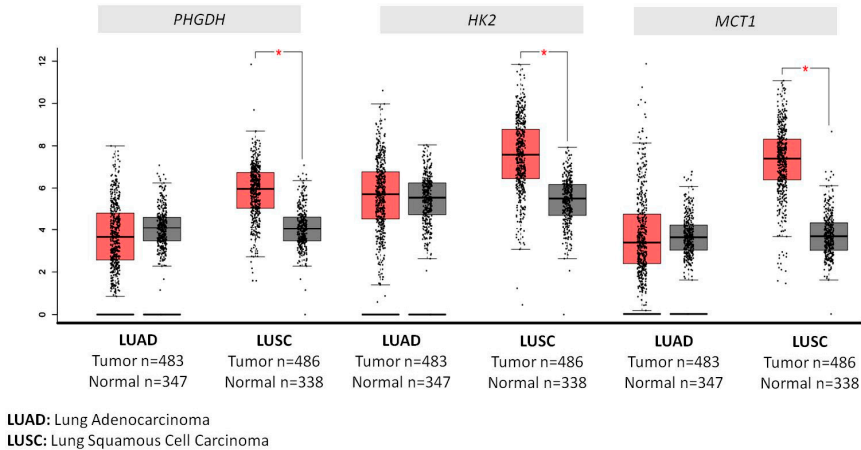

Figure S1. A plot of gene expression level between cancerous and normal tissues based on TCGA analysis.

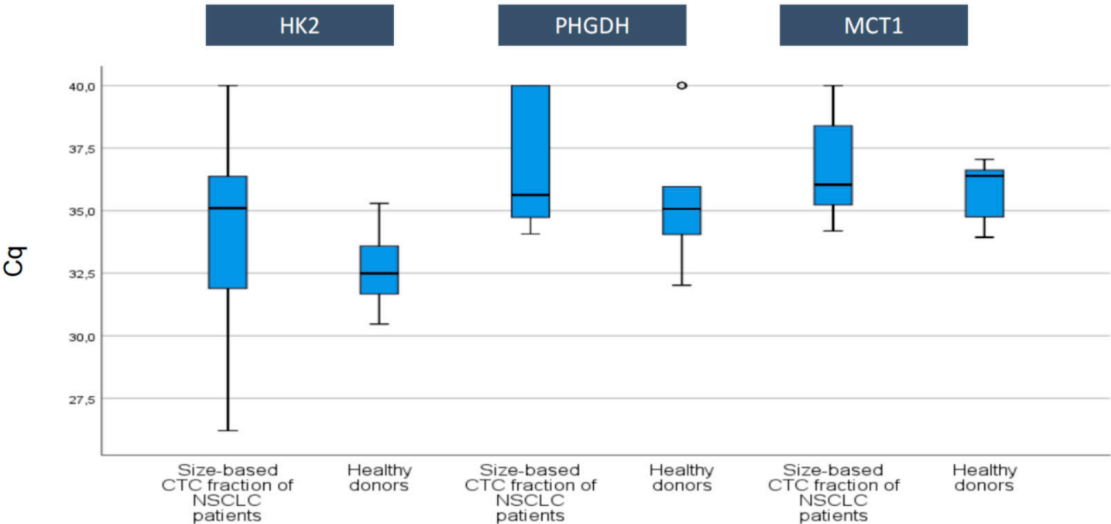

Figure S2. Cq values of each tested gene at baseline in the size-based CTC fractions of early stage NSCLC patients and healthy donors.
